# Supplementary material for: Lambda-PFLOTRAN 1.0: a workflow for incorporating organic matter chemistry informed by ultra high resolution mass spectrometry into biogeochemical modeling
Source: Copernicus journal article supplement (doi:10.5194/gmd-17-8955-2024), 2024-12-19
Supplement: Supplementary file 1 [file gmd-17-8955-2024-supplement.pdf]

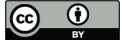

*Supplement of*

## **Lambda-PFLOTRAN 1.0: a workflow for incorporating organic matter chemistry informed by ultra high resolution mass spectrometry into biogeochemical modeling**

**Katherine A. Muller et al.**

*Correspondence to:* Katherine A. Muller ([katherine.muller@pnnl.gov](mailto:katherine.muller@pnnl.gov))

The copyright of individual parts of the supplement might differ from the article licence.

14 **SI.1 Test Case 1b and 1c Results**

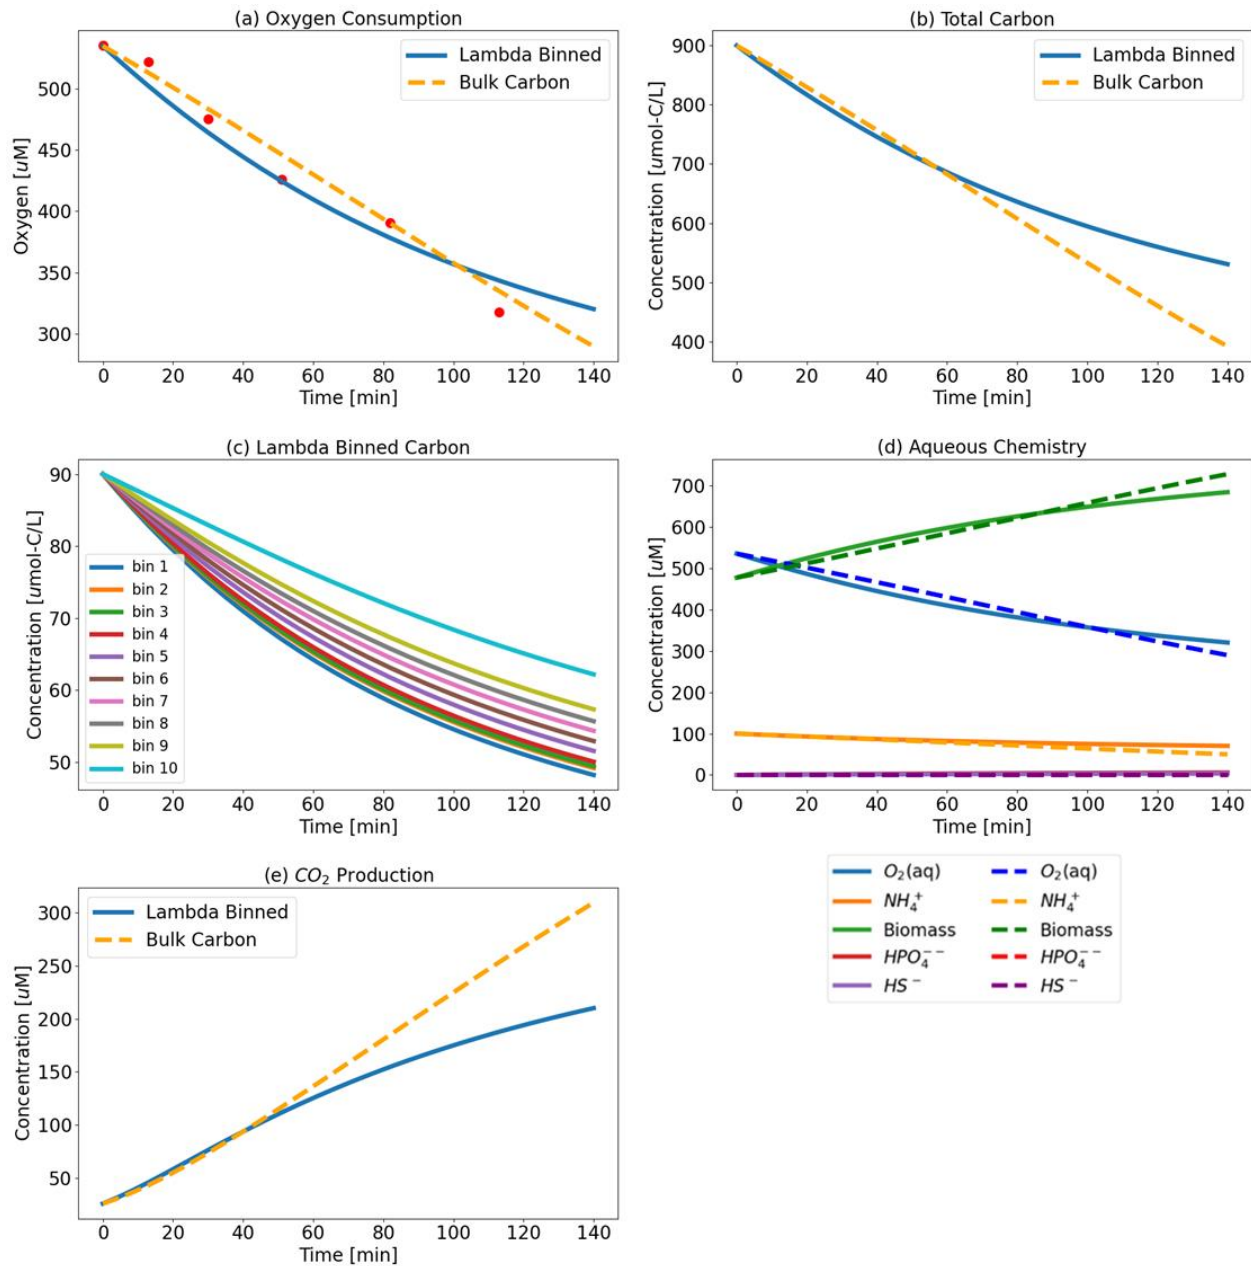

15  
 16 **Figure S1:** Test Case 1b Results – (a) Oxygen Consumption where Lambda-PFLOTRAN workflow was used to fit (blue line) to  
 17 experimental respiration data (red dots) and (b) the corresponding Total Carbon Consumption; (c) Individual Organic Matter  
 18 Consumption by  $\lambda$  bin; and (d) biogeochemistry including  $O_2$  (aq) (blue); Biomass (green);  $NH_4^+$  (orange);  $HS^-$  (purple); and  $HPO_4^-$   
 19  $^-$  (red); and (e)  $CO_2$  production for the upstream incubation. The dashed orange lines in (a, b and e) show simulation results assuming  
 20 a generic OM species of  $CH_2O$  for comparison. Fitted  $\mu_{max}$  values for the lambda binned model is  $0.055 \text{ min}^{-1}$  ( $R^2 = 0.95$ ) and fitted  
 21  $\mu_{max}$  to the bulk OM  $CH_2O$  model is  $0.0065 \text{ min}^{-1}$  ( $R^2 = 0.97$ ).  $V_h$  and  $CC$  are fixed at assumed values of  $10 \text{ m}^3$  and  $1 \text{ M}$ , respectively  
 22 in both simulations.

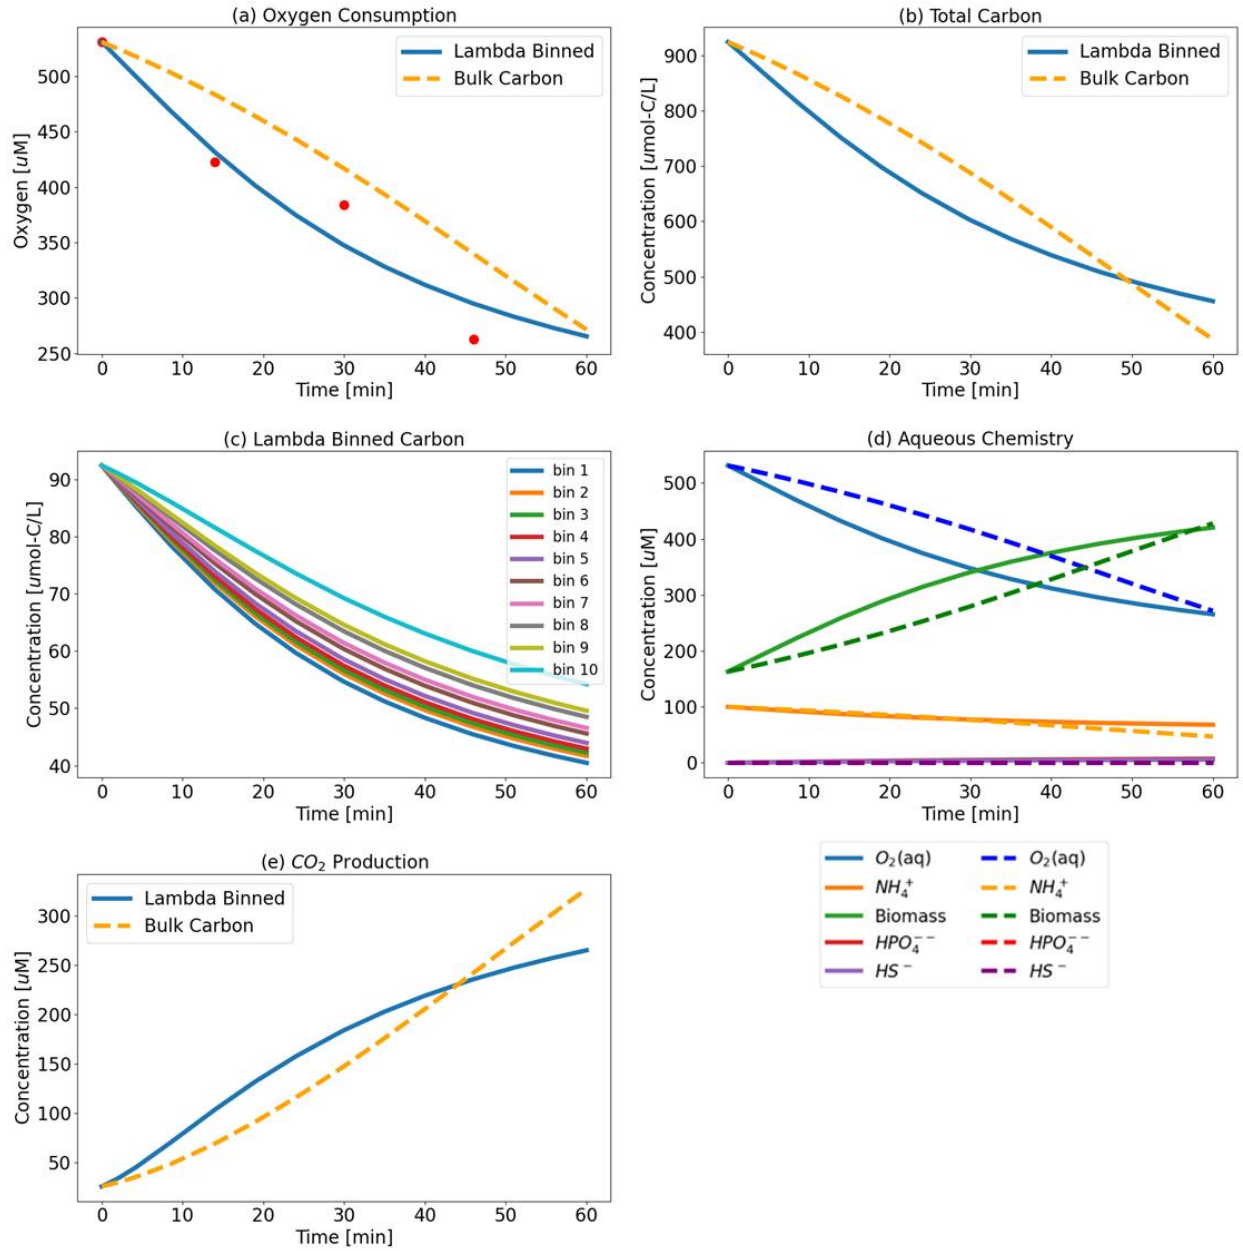

23  
 24 **Figure S2:** Test Case 1c Results – (a) Oxygen Consumption where Lambda-PFLOTTRAN workflow was used to fit (blue line) to  
 25 experimental respiration data (red dots) and (b) the corresponding Total Carbon Consumption; (c) Individual Organic Matter  
 26 Consumption by  $\lambda$  bin; and (d) biogeochemistry including  $O_2$  (aq) (blue); Biomass (green);  $NH_4^+$  (orange);  $HS^-$  (purple); and  
 27  $HPO_4^-$  (red); and (e)  $CO_2$  production for the upstream incubation. The dashed orange lines in (a, b, and e) show simulation results  
 28 assuming a generic OM species of  $CH_2O$  for comparison. Fitted  $\mu_{max}$  values for the lambda binned model is  $0.35 \text{ min}^{-1}$  ( $R^2 = 0.92$ )  
 29 and fitted  $\mu_{max}$  to the bulk OM  $CH_2O$  model is  $0.13 \text{ min}^{-1}$  ( $R^2 = 0.48$ ).  $V_h$  and CC are fixed at assumed values of  $10 \text{ m}^3$  and  $1 \text{ M}$ ,  
 30 respectively in both simulations.
